# Supplementary material for: hadge: a comprehensive pipeline for donor deconvolution in single-cell studies
Source: PubMed Central journal article supplement (PMC11055383; doi:10.1186/s13059-024-03249-z), 2024-04-26
Supplement: 13059_2024_3249_MOESM3_ESM.pdf [file 13059_2024_3249_MOESM3_ESM.pdf]

| Tool        | Runtime (min): mpXMS GX12 | Runtime (min): mpXMS GX38 |
|-------------|---------------------------|---------------------------|
| BFF         | 0.67                      | 1.82                      |
| DemuxEM     | 4.68                      | 3.8                       |
| GMM-Demux   | 0.18                      | 0.64                      |
| HashedDrops | 2.4                       | 6.8                       |
| HashSolo    | 4.28                      | 5.35                      |
| HTODemux    | 0.58                      | 1.37                      |
| Multiseq    | 0.40                      | 0.65                      |

*Table S1: Runtime (in minutes) of individual hashing-based deconvolution tools applied to the mpXMS:gx12 and mpXMS:gx38 dataset.*

| Method       | R <sup>2</sup> ndonors | p.adj  |
|--------------|------------------------|--------|
| Freemuxlet   | 0.16                   | 0.002  |
| Vireo        | 0.13                   | 0.006  |
| Souporcell   | 0.12                   | 0.006  |
| scSplit      | 0.05                   | 0.05   |
| Demuxlet(GT) | 0.12                   | 0.006  |
| Vireo(GT)    | 0.2                    | 0.0003 |

*Table S2: R-squared values of the linear model testing for association of the percent matched singlets with number of donors for each pool.*
